# Supplementary material for: Assessment of Pregnant Women’s Satisfaction with Model of Care Initiative: Antenatal Care Service at Primary Health Care in Cluster One in Riyadh, Saudi Arabia
Source: MDPI journal article supplement (doi:10.3390/healthcare10010151), 2022-01-13
Supplement: s1 [file s1]

*Supplementary Material*

**Supplementary Table S1.** The sociodemographic characteristics of the participants (n=646)

| <b>Variables</b>       | <b>Categories</b> | <b>No.</b> | <b>%</b> |
|------------------------|-------------------|------------|----------|
| Age groups (years)     | ≤25 years         | 161        | 24.9     |
|                        | 26-35 years       | 352        | 54.5     |
|                        | ≥36 years         | 133        | 20.6     |
| Education              | Basic             | 115        | 17.8     |
|                        | Secondary         | 302        | 46.7     |
|                        | University        | 229        | 35.4     |
| Monthly income         | ≤4900 SR          | 215        | 33.3     |
|                        | 5000-7000 SR      | 255        | 39.5     |
|                        | >7000 SR          | 176        | 27.2     |
| Number of Pregnancies  | One pregnancy     | 175        | 27.1     |
|                        | 2-3 pregnancies   | 328        | 50.8     |
|                        | ≥4 pregnancies    | 143        | 22.1     |
| First visit to the PHC | yes               | 253        | 39.2     |
|                        | no                | 393        | 60.8     |
